# Supplementary material
Source: Springer Nature journal article supplement (https://www.springermedizin.de/resource/supplementary/12936_2013_3036_MOESM5_ESM.pdf/9544902)
Supplement: MOESM5 [file 9544902]

# Mean Parasitaemia: 1.5%, Standard deviation 0.69%

Reference  
mean = 1.4%

Number of participants reporting

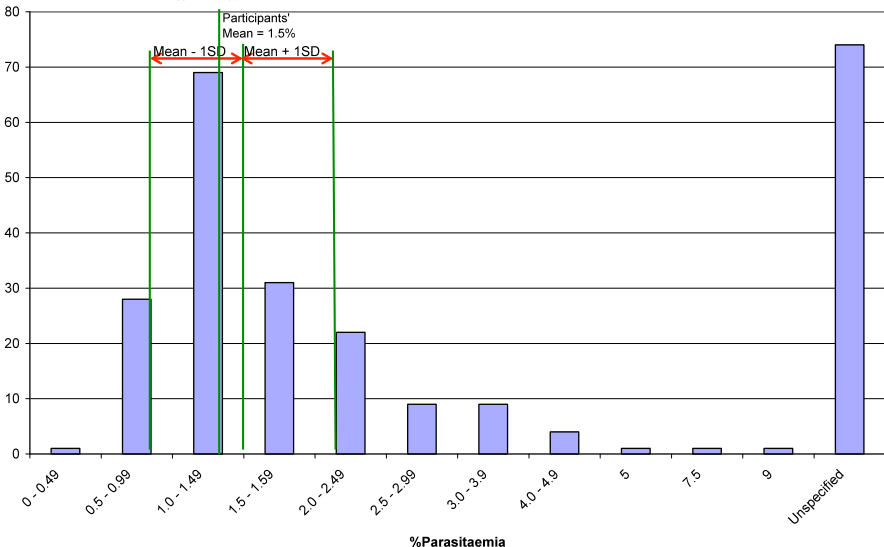

%Parasitaemia
